# Supplementary material for: Intake of Dietary Salicylates from Herbs and Spices among Adult Polish Omnivores and Vegans
Source: MDPI journal article supplement (doi:10.3390/nu12092727), 2020-09-06
Supplement: s1 [file s1]

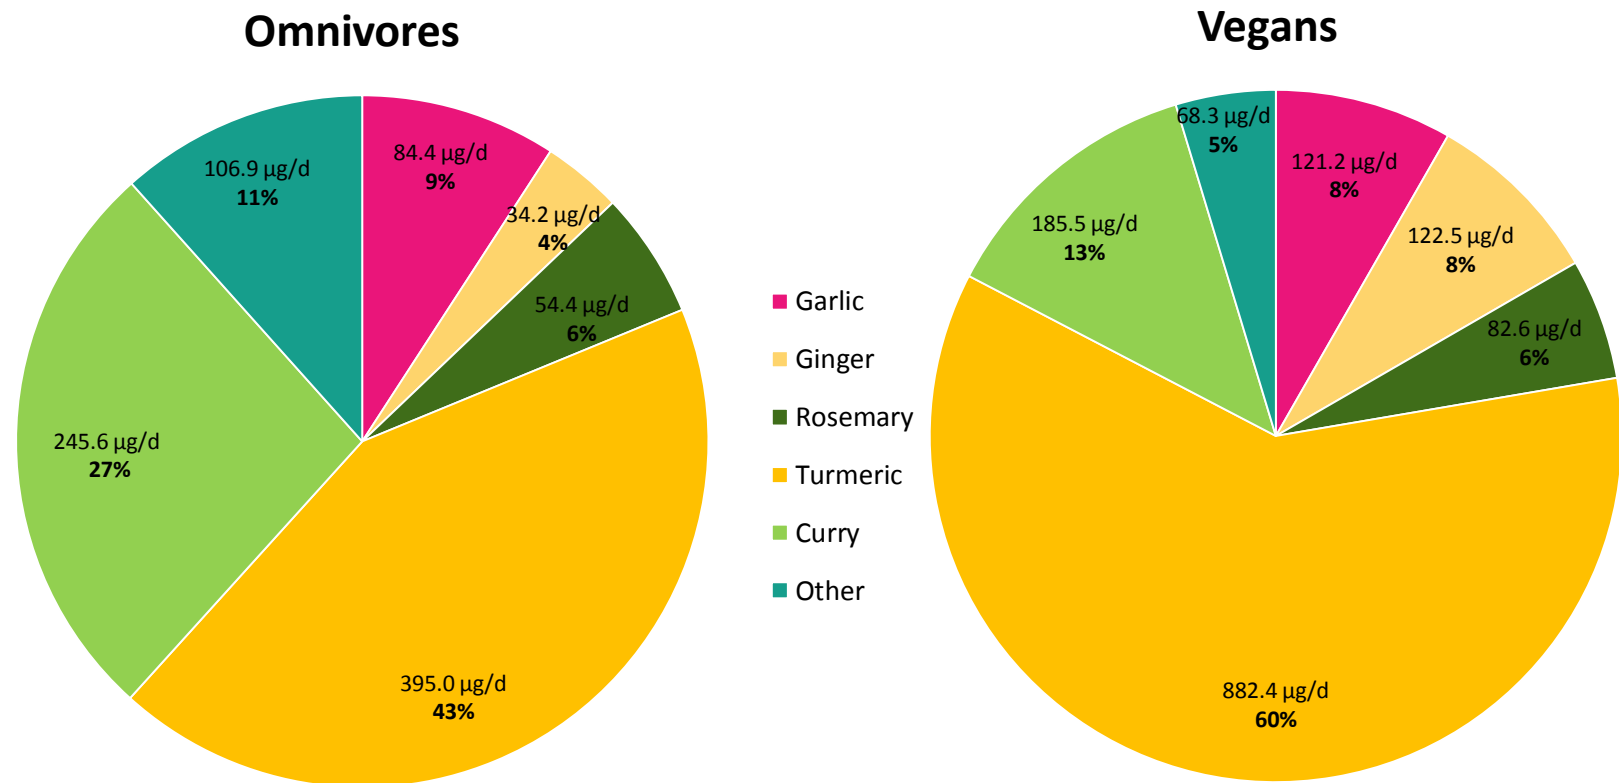

Fig. S1. The contribution of individual herbs and spices to the total dietary salicylates intake among adult omnivores and vegans
