# Supplementary material for: Intake of Dietary Salicylates from Herbs and Spices among Adult Polish Omnivores and Vegans
Source: MDPI journal article supplement (doi:10.3390/nu12092727), 2020-09-06
Supplement: s1 [file s1]

Table S1. Herbs and spices typical for vegan and mixed dishes

| Meal      | Vegan cuisine                            |                                                                                                                                                                         | Omnivorous cuisine                     |                                                                                                          |
|-----------|------------------------------------------|-------------------------------------------------------------------------------------------------------------------------------------------------------------------------|----------------------------------------|----------------------------------------------------------------------------------------------------------|
|           | Sample of the dish                       | Herbs or spices                                                                                                                                                         | Sample of the dish                     | Herbs or spices                                                                                          |
| Breakfast | Porridge                                 | vanilla, cocoa, cinnamon <sup>s</sup>                                                                                                                                   | Porridge                               | vanilla, cocoa, cinnamon <sup>s</sup>                                                                    |
|           | Sandwiches with hummus                   | garlic, cumin <sup>s</sup> , parsley <sup>s</sup>                                                                                                                       | Sandwiches with ham, cheese and tomato | pepper <sup>s</sup> , basil <sup>s</sup> , parsley <sup>s</sup>                                          |
|           | Pancakes with fruits                     | vanilla, turmeric <sup>s</sup>                                                                                                                                          | Pancakes with cottage cheese           | vanilla                                                                                                  |
|           | Tofu scramble                            | turmeric <sup>s</sup> , garlic                                                                                                                                          | Scrambled eggs                         | pepper <sup>s</sup> , chive                                                                              |
|           | Vegetable pate                           | parsley <sup>s</sup> , thyme <sup>s</sup> , cumin <sup>s</sup> , smoked paprika <sup>s</sup> , ground ginger, nutmeg, pepper <sup>s</sup>                               | Traditional pate                       | bay leaves, allspice, pepper <sup>s</sup> , nutmeg                                                       |
| Lunch     | Vegetable soups with legumes             | garlic, parsley <sup>s</sup> , basil <sup>s</sup> , thyme <sup>s</sup> , dill, sweet pepper <sup>s</sup> , hot pepper <sup>s</sup> , black pepper <sup>s</sup> , lovage | Broth with noodles                     | parsley <sup>s</sup> , bay leaves, allspice, pepper <sup>s</sup>                                         |
|           | Seitan                                   | soy sauce, oregano <sup>s</sup> , thyme <sup>s</sup> , garlic, sweet pepper <sup>s</sup> ,                                                                              | Roasted meat eg. Roast beef            | garlic, pepper <sup>s</sup> , marjoram                                                                   |
|           | Spaghetti Napoletana                     | garlic, basil <sup>s</sup> , parsley <sup>s</sup>                                                                                                                       | Spaghetti Bolognese                    | garlic, oregano <sup>s</sup> , basil <sup>s</sup> , pepper <sup>s</sup>                                  |
|           | Hindu dishes/vegetable stew – tofu curry | garlic, ginger, curry <sup>s</sup> , cayenne pepper <sup>s</sup> , cilantro <sup>s</sup>                                                                                | Traditional stew                       | sweet pepper <sup>s</sup> , hot pepper <sup>s</sup> , garlic, bay leaves, allspice, parsley <sup>s</sup> |
| Dinner    | Tortilla with falafels                   | cumin <sup>s</sup> , parsley <sup>s</sup> , pepper, cilantro <sup>s</sup> , cardamom, chili <sup>s</sup>                                                                | Sandwiches with eggs                   | pepper <sup>s</sup> , dill                                                                               |
|           | Lentil dahl                              | garlic, pepper <sup>s</sup> , garam masala <sup>s</sup> , tandoori masala <sup>s</sup> , turmeric, ginger <sup>s</sup> , parsley <sup>s</sup>                           | Bigos (sauerkraut cabbage with meat)   | pepper <sup>s</sup> , bay leaf, allspice, caraway, marjoram                                              |
|           | Salad with cereals                       | garlic, parsley <sup>s</sup> , basil <sup>s</sup> , dill                                                                                                                | Salad caprese                          | pepper <sup>s</sup> , basil <sup>s</sup>                                                                 |

<sup>s</sup> – herbs or spices rich in salicylates
